# Supplementary material for: Automatic dispensing cabinets and governance of controlled drugs: an exploratory study in an intensive care unit
Source: HighWire-hosted journal article supplement (doi:10.1136/ejhpharm-2020-002552), 2021-05-11
Supplement: ejhpharm-2020-002552supp002_data_supplement.pdf [file ejhpharm-2020-002552supp002_data_supplement.pdf]

**Appendix 2 – Additional tables**

*Analysis of ADC transaction logs***Table A – Controlled Drugs – Time from removing a dose from ADC ('issue') to documenting waste (ADC transaction logs, 26 March – 30 June)**

| Drug (Controlled)      | Issue Transactions | Waste Transactions |             | Waste Concurrent with Issue |                  | Waste by Separate Transaction to Issue |                  |              |           |           |      |           |            |        |
|------------------------|--------------------|--------------------|-------------|-----------------------------|------------------|----------------------------------------|------------------|--------------|-----------|-----------|------|-----------|------------|--------|
|                        | n                  | n                  | % of Issued | n                           | % of Total Waste | n                                      | % of Total Waste | Average Time | Range Min | Range Max | <10m | 10m - 1hr | 1hr - 24hr | >24 hr |
| Bupivacaine + Fentanyl | 9                  | 3                  | 33.3%       | 3                           | 100.0%           | 0                                      | n/a              | n/a          | n/a       | n/a       |      |           |            |        |
| Clobazam               | 150                | 52                 | 34.7%       | 46                          | 88.5%            | 6                                      | 11.5%            | 0:29:06      | 0:00:30   | 2:48:54   | 5    |           | 1          |        |
| Clonazepam             | 2                  | 2                  | 100.0%      | 1                           | 50.0%            | 1                                      | 50.0%            | 0:01:57      | 0:01:57   | 0:01:57   | 1    |           |            |        |
| Diazepam               | 156                | 57                 | 36.5%       | 48                          | 84.2%            | 9                                      | 15.8%            | 0:22:46      | 0:00:20   | 3:18:01   | 8    |           | 1          |        |
| Fentanyl               | 640                | 390                | 60.9%       | 326                         | 83.6%            | 64                                     | 16.4%            | 2:37:09      | 0:00:17   | 84:12:10  | 44   | 4         | 15         | 1      |
| Ketamine               | 229                | 194                | 84.7%       | 110                         | 56.7%            | 84                                     | 43.3%            | 4:17:27      | 0:00:23   | 84:12:55  | 10   | 10        | 63         | 1      |
| Midazolam              | 765                | 593                | 77.5%       | 495                         | 83.5%            | 98                                     | 16.5%            | 0:55:14      | 0:00:15   | 9:25:36   | 56   | 16        | 26         |        |
| Morphine Hydrochloride | 75                 | 49                 | 65.3%       | 44                          | 89.8%            | 5                                      | 10.2%            | 0:00:36      | 0:00:14   | 0:00:54   | 5    |           |            |        |
| Morphine Sulfate       | 325                | 237                | 72.9%       | 195                         | 82.3%            | 42                                     | 17.7%            | 4:28:15      | 0:00:19   | 172:00:21 | 37   | 1         | 3          | 1      |
| Morphine Sulfate MR    | 57                 | 49                 | 86.0%       | 43                          | 87.8%            | 6                                      | 12.2%            | 0:01:30      | 0:00:18   | 0:06:27   | 6    |           |            |        |
| Oxycodone              | 32                 | 25                 | 78.1%       | 24                          | 96.0%            | 1                                      | 4.0%             | 0:00:31      | 0:00:31   | 0:00:31   | 1    |           |            |        |
| Phenobarbital          | 31                 | 17                 | 54.8%       | 15                          | 88.2%            | 2                                      | 11.8%            | 0:02:33      | 0:01:01   | 0:04:05   | 2    |           |            |        |
| Phenobarbitone         | 1                  | 0                  | 0.0%        | 0                           | n/a              | n/a                                    | n/a              | n/a          | n/a       | n/a       |      |           |            |        |
| Propofol               | 157                | 12                 | 7.6%        | 2                           | 16.7%            | 10                                     | 83.3%            | 6:25:49      | 0:55:18   | 16:03:49  |      | 2         | 8          |        |
| Thiopentone            | 3                  | 1                  | 33.3%       | 1                           | 100.0%           | 0                                      | n/a              | n/a          | n/a       | n/a       |      |           |            |        |
| Total *                | 2632               | 1681               | 63.9%       | 1353                        | 80.5%            | 328                                    | 19.5%            | 2:40:26      | 0:00:14   | 172:00:21 | 175  | 33        | 117        | 3      |

\* Not including the controlled drug in the fridge – accessed by generic 'fridge item' in the ADC and documented in registries

*Analysis of data from audits of registries of controlled drugs***Table B. Frequency of documentation inaccuracies in controlled drugs registries in the ICU and control wards (January – June 2019)**

| Type of documentation inaccuracy                              | ICU<br>n (%)   | Oncology<br>n (%) | Orthopaedics<br>n (%) |
|---------------------------------------------------------------|----------------|-------------------|-----------------------|
|                                                               | (doses*: 5783) | (doses*:2930)     | (doses*:3750)         |
| <b>Asterisks</b> representing corrections to the register     | 305 (5.3%)     | 132 (4.5%)        | 282 (7.5%)            |
| <b>Calculation errors</b> identified by nurses or pharmacists | 9 (0.2%)       | 3 (0.1%)          | 48 (1.3%)             |
| <b>Other</b> (e.g. balance changed incorrectly)               | 3 (0.1%)       | 1 (0.0%)          | 9 (0.2%)              |
|                                                               |                |                   |                       |
| <b>Missing amounts</b> (given, discarded, balance)            | 47 (0.8%)      | 26 (0.9%)         | 20 (0.5%)             |

% are calculated on number of doses. \* The number of doses is the number of entries documented in registries – i.e. number of times medications have been recorded as given (or not) to patients. The table does not include data about discrepancies, reported in a separate table.

**Table C. CD discrepancies (losses and gains) in the ICU and control wards in the study period (January – June 2019)**

|                                                | ICU (*)<br>[pre/post ADC]<br>n (%) | Oncology<br>[no ADC in use]<br>n (%) | Orthopaedics<br>[no ADC in use]<br>n (%) |
|------------------------------------------------|------------------------------------|--------------------------------------|------------------------------------------|
|                                                | (doses*: 5783)                     | (doses*:2930)                        | (doses*:3750)                            |
| Discrepancies identified by nurses/pharmacists | 54 (0.9%)                          | 11 (0.4%)                            | 37 (1.0%)                                |

(\*) Limited to discrepancies identified in registries (excluding discrepancies in ADC). % are calculated on number of doses. \* The number of doses is the number of entries documented in registries – i.e. number of times medications have been recorded as given (or not) to patients.

*Comparative analysis of data from audits of controlled drugs registries and ADC transaction logs***Table D. CD discrepancies (losses and gains) in the ICU and control wards in the three months before and after ADC implementation (as recorded in registries and ADC transactions logs)**

|                                     | Jan-March 2019 (pre-ADC) * |                 |                | April – June 2019 (post-ADC) |                 |                |
|-------------------------------------|----------------------------|-----------------|----------------|------------------------------|-----------------|----------------|
|                                     | n of doses                 | Losses<br>N (%) | Gains<br>N (%) | n of doses                   | Losses<br>N (%) | Gains<br>N (%) |
| <b>ICU</b>                          |                            |                 |                |                              |                 |                |
| Medications in bottles              | 1597                       | 15 (0.94%)      | 1 (0.06%)      | 2273                         | 30 (1.32%)      | 6 (0.26%)      |
| Medications in unit doses           | 1792                       | 2 (0.40%)       | 0              | 121<br>[in registries]       | 0               | 0              |
|                                     |                            |                 |                | 7366 (*)<br>[in ADC]         | 15              | 14             |
| <b>Oncology [no ADC in use]</b>     |                            |                 |                |                              |                 |                |
| Medications in bottles              | 336                        | 4 (1.19%)       | 0              | 409                          | 5 (1.22%)       | 2 (0.49%)      |
| Medications in unit doses           | 1045                       | 0               | 0              | 1140                         | 0               | 0              |
| <b>Orthopaedics [no ADC in use]</b> |                            |                 |                |                              |                 |                |
| Medications in bottles              | 1123                       | 19 (1.42%)      | 1 (0.09%)      | 1031                         | 14 (1.36%)      | 2 (0.19%)      |
| Medications in unit doses           | 889                        | 0               | 0              | 707                          | 0               | 0              |
